# Supplementary material
Source: HighWire-hosted journal article supplement (https://bmjopen.bmj.com/content/10/3/e035121)

**Community Treatment Orders: A controlled electronic case register study  
Supplementary Material**

**Table S1** Number of patients in CTO and control group by year of study entry ( $n = 4,489$ )

| Year of study entry         | Control group n (%) | CTO group n (%) | Total |
|-----------------------------|---------------------|-----------------|-------|
| 2008                        | 560 (96.2%)         | 22 (3.8%)       | 582   |
| 2009                        | 522 (81.3%)         | 120 (18.7%)     | 642   |
| 2010                        | 503 (79.2%)         | 132 (20.8%)     | 635   |
| 2011                        | 556 (80.6%)         | 134 (19.4%)     | 690   |
| 2012                        | 615 (80.6%)         | 148 (19.4%)     | 763   |
| 2013                        | 625 (75.7%)         | 201 (24.3%)     | 826   |
| 2014                        | 278 (79.2%)         | 73 (20.8%)      | 351   |
| Total                       | 3659 (81.5%)        | 830 (18.5%)     | 4489  |
| $\chi^2 = 106.6, p < 0.001$ |                     |                 |       |

**Table S2** Discrete time analysis predicting time to next admission by CTO exposure during discrete 12 month follow-up periods with multivariable logistic regression.

| Follow-up period (n)                                                                                               | Univariate          |         | Multivariable        |         |
|--------------------------------------------------------------------------------------------------------------------|---------------------|---------|----------------------|---------|
|                                                                                                                    | Odds Ratio (95% CI) | p value | Odds Ratio (95% CI)  | p value |
| 0 to 12 months (4489)                                                                                              | 1.78 (1.49 to 2.11) | <0.001  | 1.63 (1.34 to 1.98)  | <0.001  |
| 12 to 24 months (4489)                                                                                             | 1.58 (1.24 to 2.01) | <0.001  | 1.42 (1.08 to 1/85)  | 0.011   |
| 24 to 36 months (3766)                                                                                             | 1.64 (1.19 to 2.26) | 0.003   | 1.53 (1.07 to 2.20)  | 0.02    |
| 36 to 48 months (2995)                                                                                             | 2.37 (1.52 to 3.69) | <0.001  | 2.01 (1.023 to 3.30) | 0.006   |
| 48 to 60 months (2253)                                                                                             | 2.36 (1.36 to 4.09) | 0.002   | 1.84 (1.00 to 3.39)  | 0.05    |
| Multivariable model adjusted for age, sex, diagnosis, forensic status, antipsychotic route and year of study entry |                     |         |                      |         |

**Community Treatment Orders: A controlled electronic case register study  
Supplementary Material****Figure S1** Kaplan-Meier survival graph.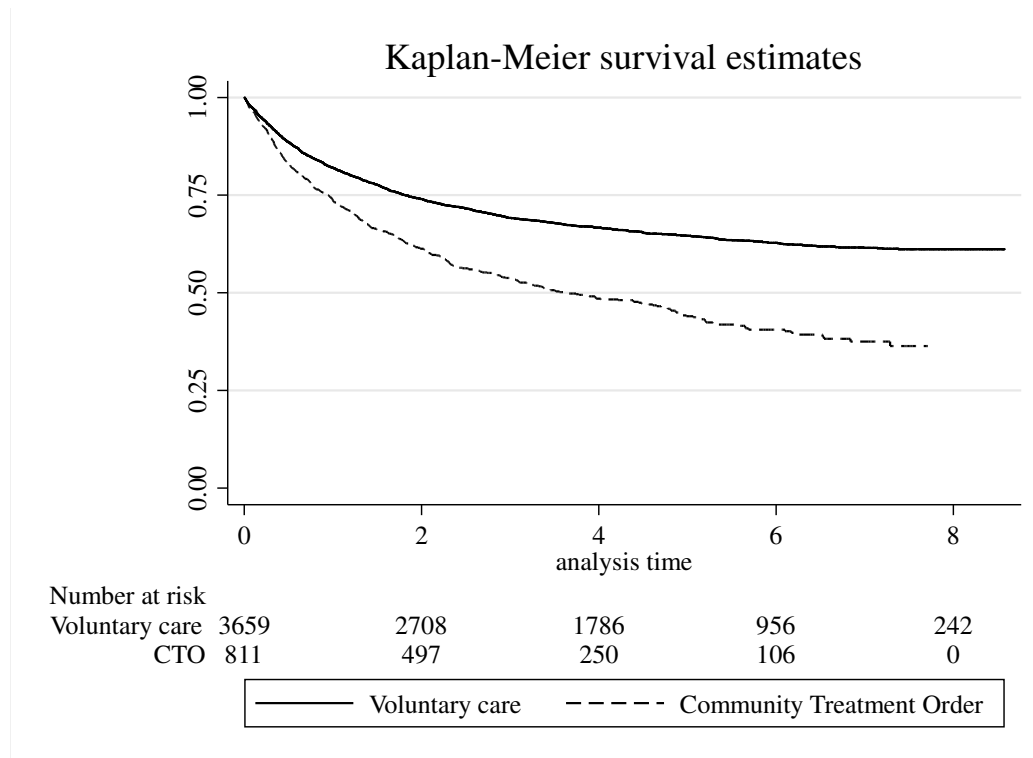

**Community Treatment Orders: A controlled electronic case register study  
Supplementary Material**

**Figure S2** Proportion of individuals with either a reduction or an increase in the amount of days spent in inpatient care in the 24 months before and after index admission, by CTO exposure (n = 4460).

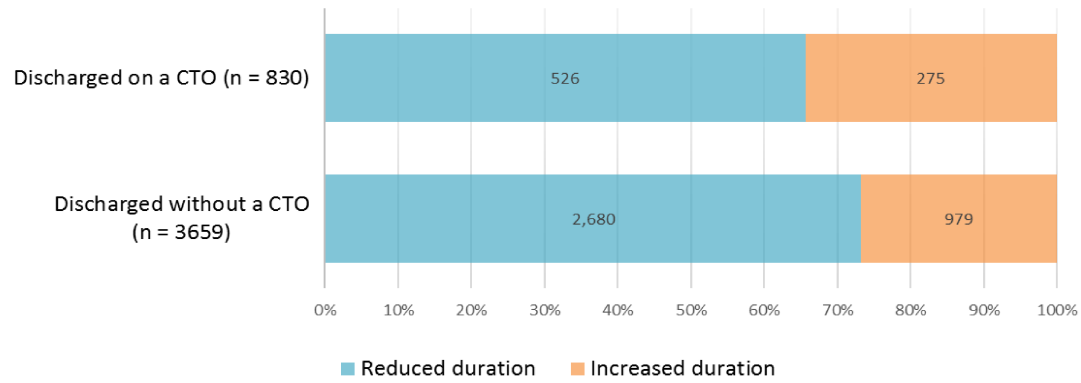

Supplement: inline-supplementary-material-1 [file inline-supplementary-material-1.pdf]
